# Supplementary material for: Vector perturbation based adaptive distributed precoding scheme with limited feedback for CoMP systems
Source: Springer Nature journal article supplement (doi:10.1186/1687-1499-2011-8), 2011-06-08
Supplement: 13638_2010_7_MOESM2_ESM.pdf [file 13638_2010_7_MOESM2_ESM.pdf]

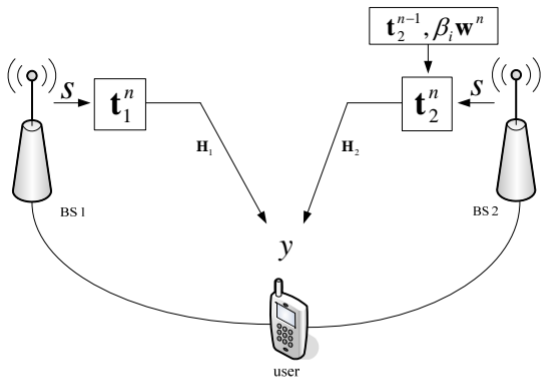

$\mathbf{H}_1$   $\mathbf{H}_2$  estimated by user

$\mathbf{t}_1^n$  feed back from user to BS1

$\beta_i$  feed back from user to BS2
