# Supplementary material for: Vector perturbation based adaptive distributed precoding scheme with limited feedback for CoMP systems
Source: Springer Nature journal article supplement (doi:10.1186/1687-1499-2011-8), 2011-06-08

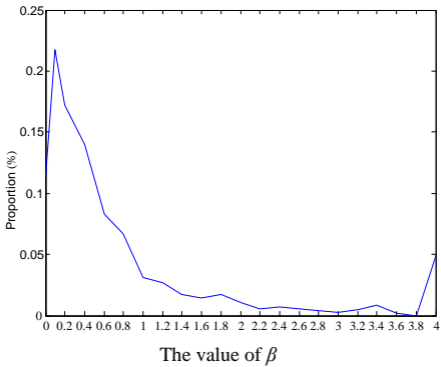

Supplement: 13638_2010_7_MOESM3_ESM.pdf [file 13638_2010_7_MOESM3_ESM.pdf]
